# Supplementary material
Source: PubMed Central journal article supplement (PMC6093744)

Figure S1: FACS analysis of the expression of adhesion molecules on human neutrophils

Purified human neutrophils were stimulated with C5a (1 µg/mL), IL-8 (10 µg/mL) or fMLP (1 µM) in the presence of HSA (1 µM) or IAIP (100 µg/mL) for 1 h at 37°C. The neutrophils were stained by FITC-labeled anti-human CD 11b Ab, FITC-labeled anti-human CD 18 Ab, FITC-labeled anti-human CD 162 Ab or FITC-labeled anti-human CD 62L Ab for 25 min at 4°C. After washing, the Abs were fixed with 0.5 % PFA and the fluorescence intensity of the cells was analyzed on a FACS caliber. The data were representative of three independent experiments.

Figure S2: IAIP inhibits LPS- and calcium ionophore (A 23187)-induced neutrophil extracellular traps (NETs) formation

Neutrophils isolated from peripheral blood of normal volunteers were stimulated with LPS 10 ng/mL or calcium ionophore (A 23187) at 1 µM or 5 µM in the presence of HBSS, HSA 1 µM or IAIP 100 µg/mL for 4 h at 37°C in 5% CO<sub>2</sub> atmosphere. NETs were visualized by immunofluorescence of Sytox orange and was analyzed by the In Cell Analyzer 2000. Neutrophil's cytoplasm was stained by calcein in green and nucleus was stained with Hoechst 33342 in blue. Typical pictures of fluorescence staining from each group were shown (A-C).

Scale bars, 100  $\mu\text{m}$ . Quantitative analysis of NETs count (D-F) and total area of NETs were shown in (G-I). the results are the means  $\pm$  SEM of three experiments. **\*\*P**< 0.01 vs. HBSS, **##** P< 0.01 vs. HSA and **#** P<0.05 vs. HSA.

Figure S3: Effects of IAIP on spontaneous death of isolated neutrophils

Neutrophils isolated from peripheral blood of normal volunteers were treated with HSA 1 $\mu\text{M}$  or IAIP 100  $\mu\text{g}/\text{mL}$  for 4 h at 37 $^{\circ}\text{C}$  in 5%  $\text{CO}_2$  atmosphere. The dead cells were visualized by Sytox orange using In Cell Analyzer 2000. Sytox orange is a high affinity nucleic acid stain that can easily penetrate the compromised plasma membranes but does not pass across the intact cell membranes. Typical pictures of fluorescence staining from each group were shown (A). Scale bars, 100  $\mu\text{m}$ . Quantitative analysis of dead cell counts was shown in (B). The results are the means  $\pm$  SEM of three experiments. **\*P**<0.05 vs. HBSS and **#** P< 0.05 vs. HSA.

## **Supplemental video legend**

### **Video 1-6**

#### *Neutrophils passage through microcapillaries*

The purified human neutrophils were incubated with HBSS (video 1), HSA (1  $\mu$ M) (video 2), IAIP (100 and 200  $\mu$ g/mL) (video 3 and 4) or bikunin (100 and 200  $\mu$ g/mL) (video 5 and 6) for 30 minutes at 37°C and applied to a MC-FAN. The passage of neutrophils through was monitored by a CCD camera.

**Figure S1**

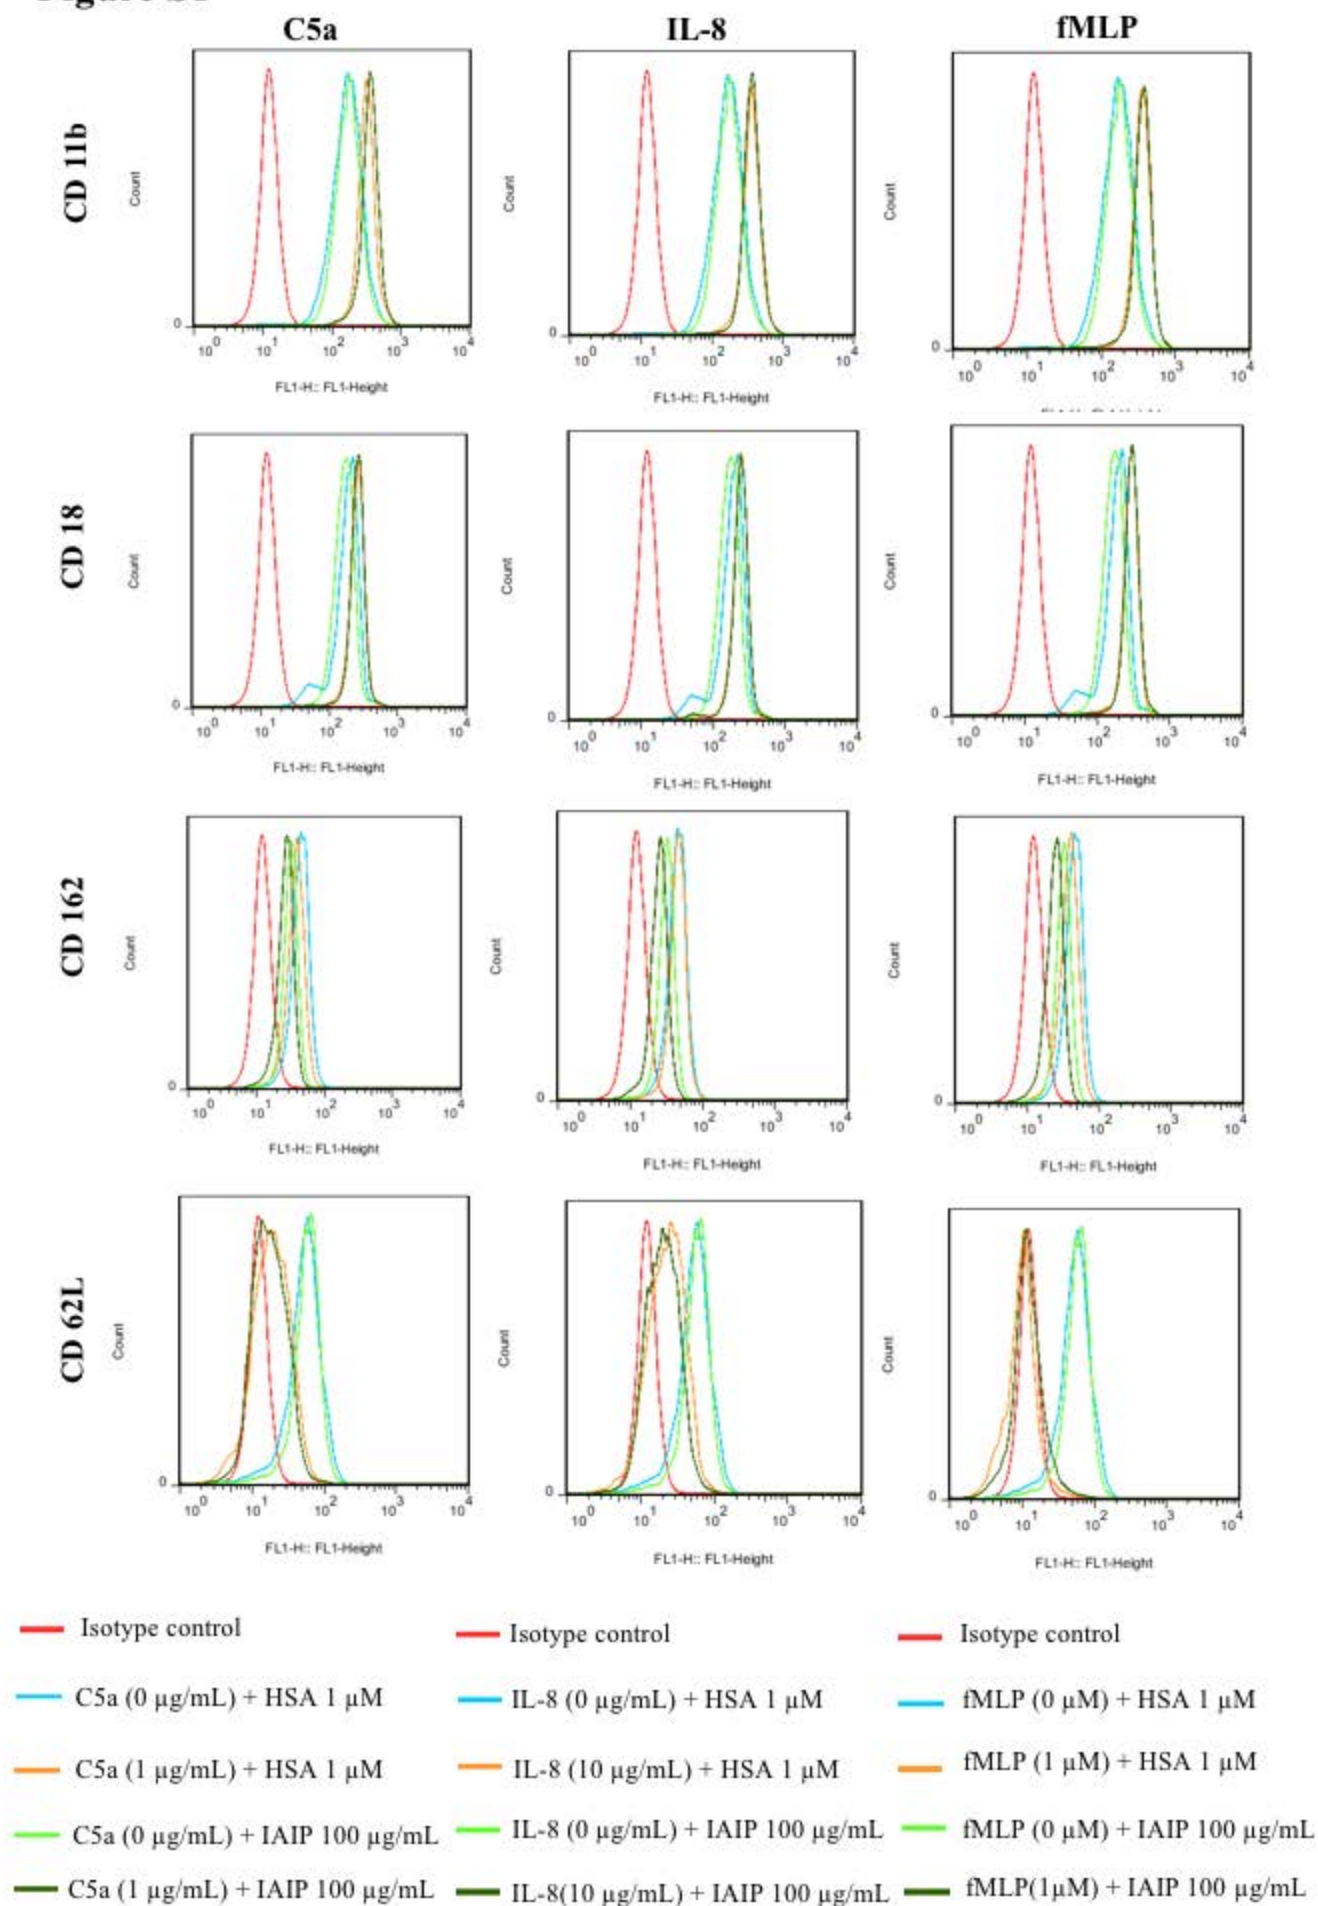

**Figure S2**

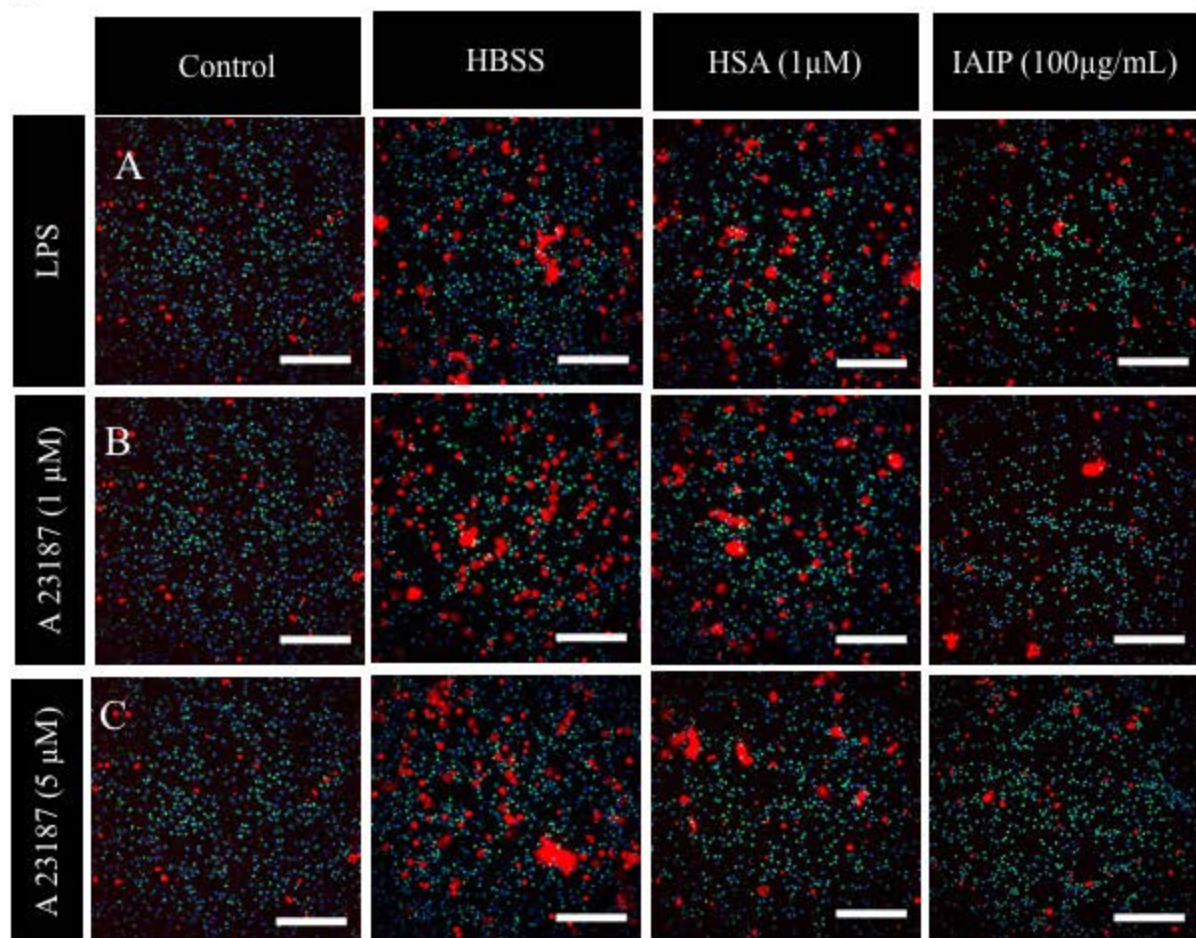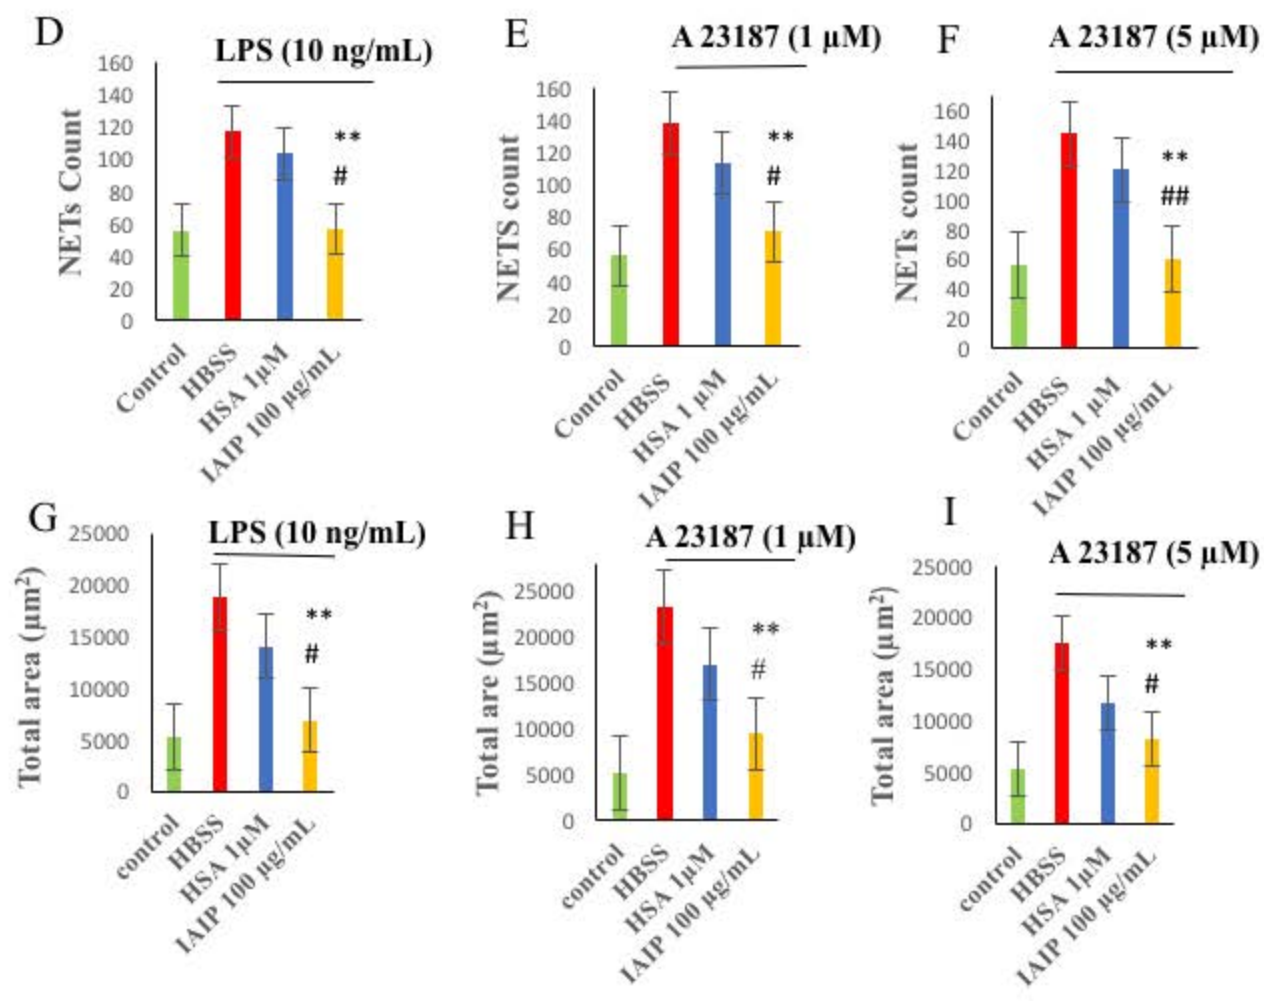

**Figure S3**

**A**

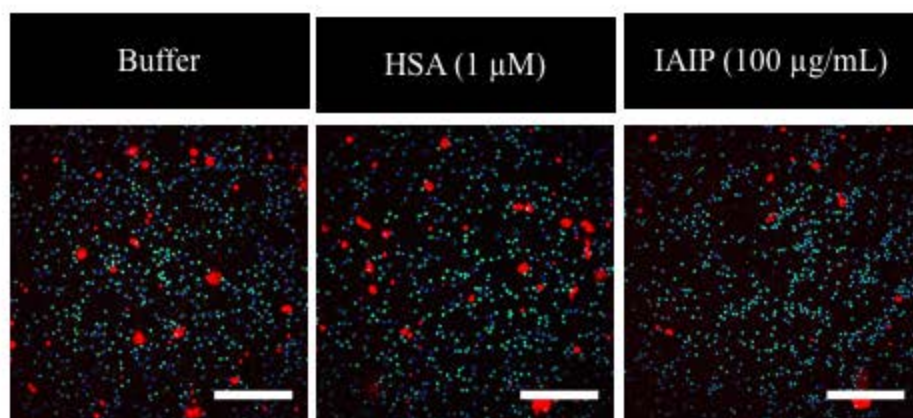

**B**

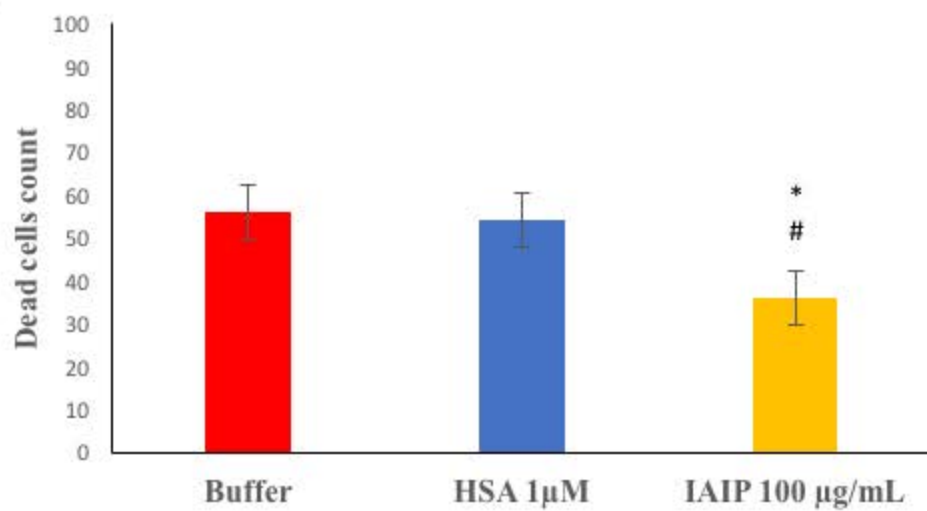

Supplement: ba018986-suppl1.pdf [file ba018986-suppl1.pdf]
